# Supplementary material
Source: PubMed Central journal article supplement (PMC4817784)
Supplement: mt201565x1.pdf [file mt201565x1.pdf]

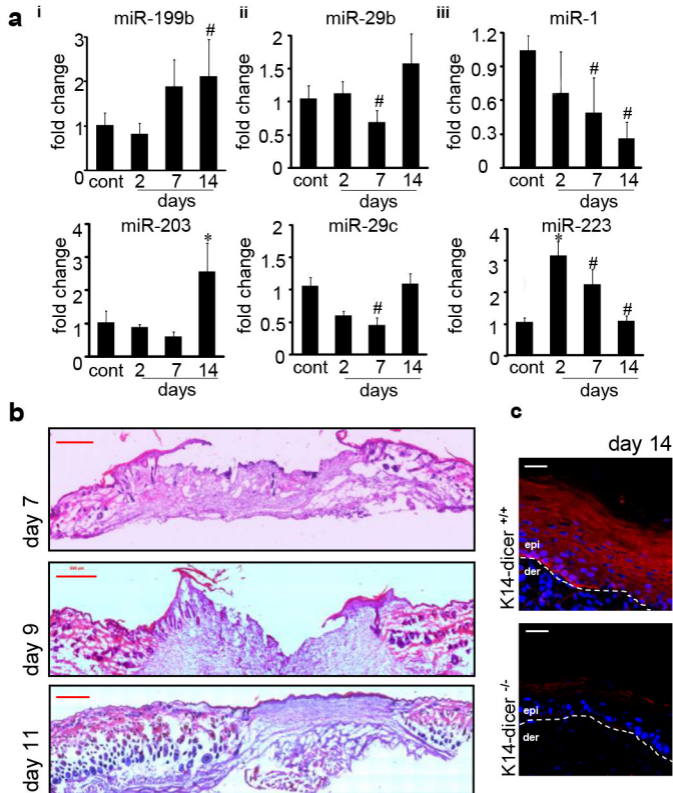

**Figure S1:** (a) Quantitative PCR analysis of different miRNAs from 3 different clusters at different time points post wounding. (n = 4, # p<0.05; \* p<0.001). (b) Representative mosaic image showing re-epithelialization at day 7, 9 and 11 after 8 X 16mm wounding. Scale bar = 500μm (c) Immunohistochemical localization of Dicer in the wound edge epidermis. The sections were counter stained with DAPI (blue). The dermal (der) and epidermal (epi) junction is indicated by a dashed white line in each panel. Scale bar = 20 μm.

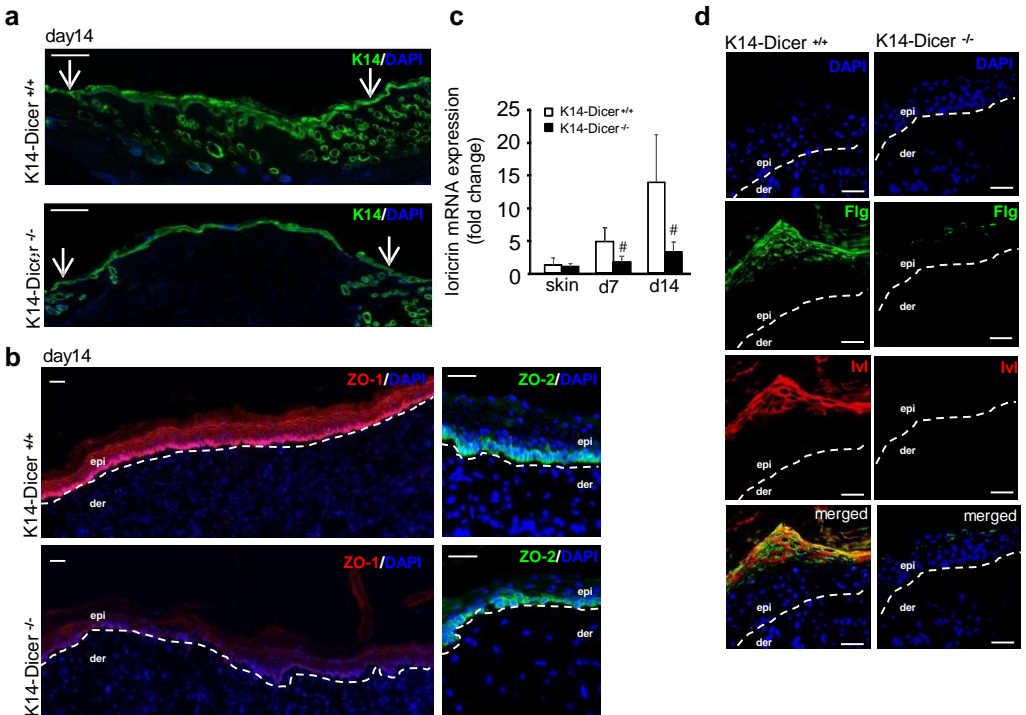

**Figure S2:** (a) Representative mosaic image from serial wound cross-sections shows K14 immunocytochemistry, counterstained with DAPI, at day 14 post-wounding from three independent experiments. White arrows indicate wound edges. Scale bar = 200 $\mu$ m (b) Representative image from serial wound cross-sections shows ZO-1 mosaic and ZO-2 immunocytochemistry counterstained with DAPI, at day 14 post-wounding from three independent experiments. Scale bar = 50 $\mu$ m (c) Quantitative PCR analysis of loricrin at D0 (skin), day 7 and day 14 wound edge tissue. (n=4, # p<0.05). (d) Representative photograph from wound cross-sections showing filaggrin and involucrin co-localization, counterstained with DAPI, at day 14 post-wounding from three independent experiments. The dermal (der) and epidermal (epi) junction is indicated by a dashed white line in each panel. Scale bar = 20  $\mu$ m

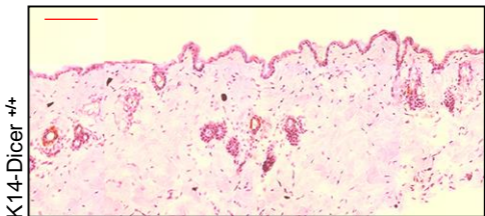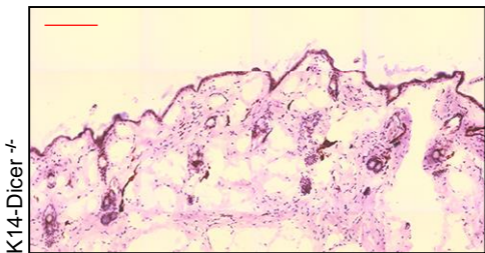

scale bar = 200  $\mu$ m

**Figure S3:** Representative mosaic image of the skin from control and Dicer ablated mice showing immunohistochemical localization of p21<sup>waf1/Cip1</sup> in the epidermis. Counter staining was performed using hematoxylin. Scale bar = 200 $\mu$ m

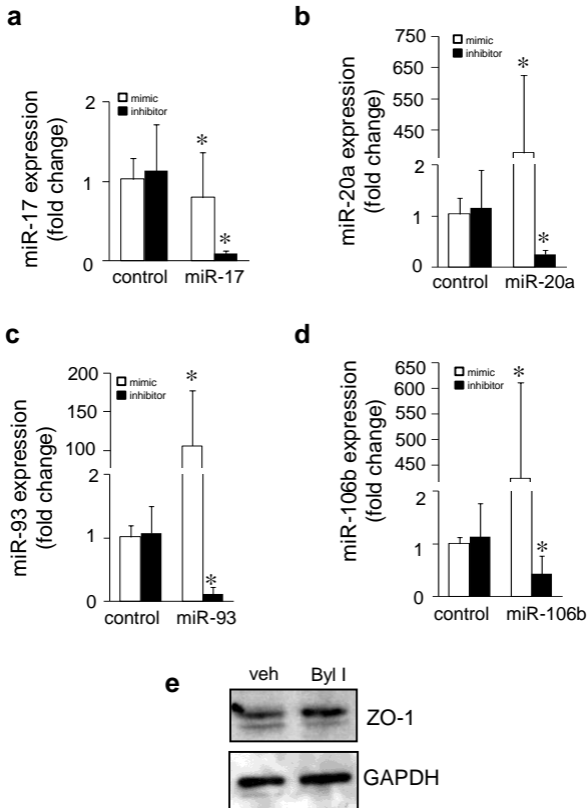

**Figure S4:** Quantitative PCR analysis of (a) miR-17 (b) miR-20a (c) miR-93 and (d) miR-106b after delivery of mimic and inhibitor respectively. Data expressed as mean  $\pm$  SD (n=4). \*  $p < 0.001$ . (e) Representative Western blot of ZO-1 in HaCaT cells 24h after treatment with p21 inhibitor Butyrolactone I.

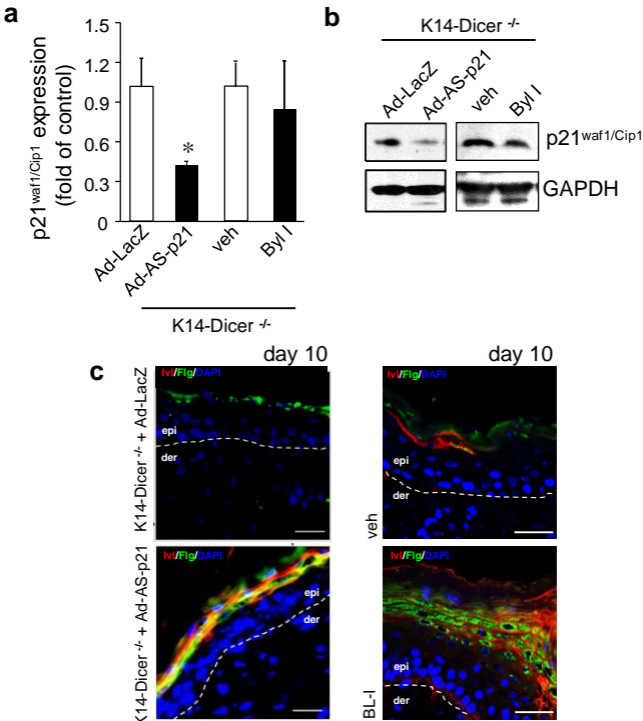

**Figure S5:** (a) Quantitative PCR analysis and (b) Western blot of p21<sup>waf1/Cip1</sup> from the wound edge tissue at day 10 post wounding after treating with adeno viral and Butyrolactone I (pharmacological inhibitor of p21<sup>waf1/Cip1</sup>). The quantification of the signal was normalized against GAPDH and the results were expressed as fold induction compared with that of controls. Data were expressed as mean  $\pm$  SD ( $n = 3$ ; \*  $p < 0.001$ ). (c) Representative photograph of wound cross-sections showing filaggrin and involucrin co-localization, counterstained with DAPI, at day 10 post-wounding from three independent experiments. The dermal (der) and epidermal (epi) junction is indicated by a dashed white line in each panel. Scale bar = 20  $\mu$ m

**Supplement table 1.**

| <b>Primer</b> |         | <b>Sequence</b>                  | <b>Accession No</b> |
|---------------|---------|----------------------------------|---------------------|
| m-GAPDH       | Forward | 5'- GTGCAGTGCCAGCCTCGTCC-3'      | NM_008084           |
|               | Reverse | 5'- GCACCGGCCTCACCCCATTT-3'      |                     |
| m-Dicer       | Forward | 5'- ACACGCTCTGGAGAGGTCACCATAT-3' | NM_148948           |
|               | Reverse | 5'- TCCAAAGTGCCGGAGTCATTAA-3'    |                     |
| m-p21         | Forward | 5'- ACAGGAGCAAAGTGTGCCGTTGT-3'   | NM_007669           |
|               | Reverse | 5'- GCTCAGACACCAGAGTGCAAGACA -3' |                     |
| m-Loricrin    | Forward | 5'- ACGGAGGCGGTTCTAGCGGT-3'      | NM_008508           |
|               | Reverse | 5'- GCCCCTCCGTAGCTCTGCT-3'       |                     |
| h-GAPDH       | Forward | 5'- TGACGCTGGGGCTGGCATTG-3'      | NM_002046           |
|               | Reverse | 5'- GCTCTTGCTGGGGCTGGTGG-3'      |                     |
| h-p21         | Forward | 5'- GGGTCGAAAACGGCGGCAGA-3'      | NM_078467           |
|               | Reverse | 5'- GGGGGCGGCCAGGGTATGTA-3'      |                     |
| h-Loricrin    | Forward | 5'- TGGTGGCTGCGGCTTCTTCG-3'      | NM_000427           |
|               | Reverse | 5'- GCCCCCACCGCTGGAGAAAC-3'      |                     |
